# Supplementary material
Source: Springer Nature journal article supplement (https://www.springermedizin.de/resource/supplementary/13014_2013_1250_MOESM5_ESM.pdf/9634624)

Fig. 4

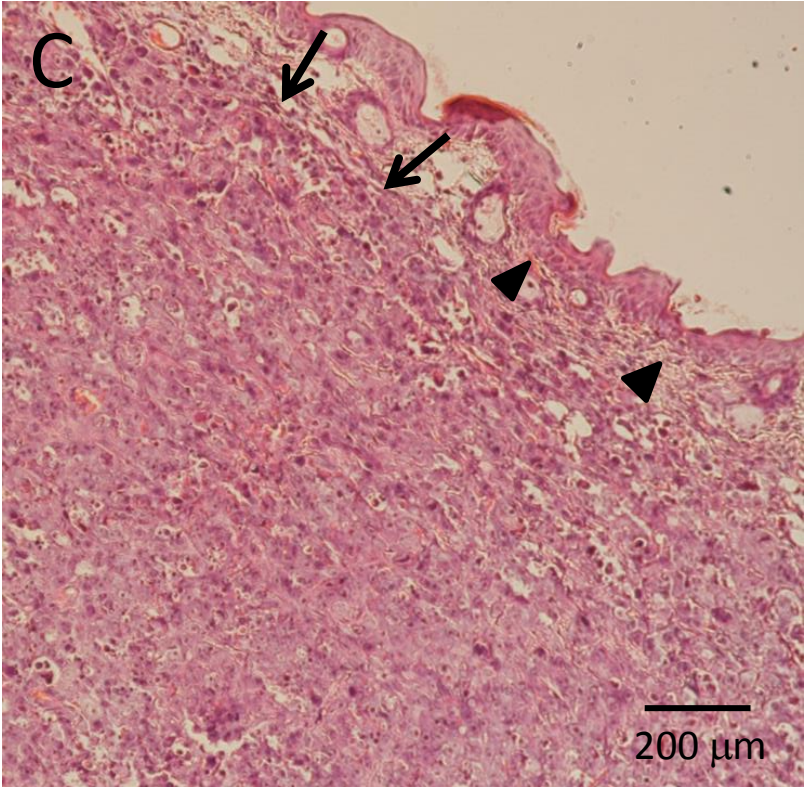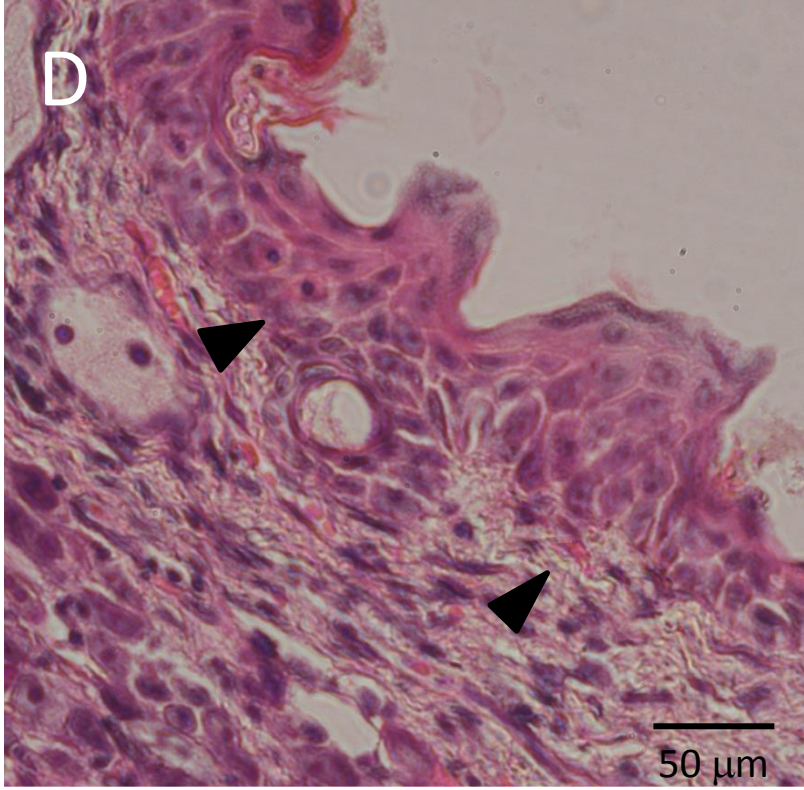

Supplement: MOESM5 [file 9634624]
